# Supplementary material for: Unraveling the critical impact of anisotropic La motion on methane dissociation over the La 2 O 3 (001) surface
Source: Royal Society of Chemistry journal article supplement (doi:10.1039/d5cy01154j), 2025-01-01
Supplement: d5cy01154j1.pdf [file d5cy01154j1.pdf]

## Supplementary Information for

### Unraveling the Critical Impact of Anisotropic La Motion on Methane Dissociation over the La<sub>2</sub>O<sub>3</sub> (001) Surface

*Feiyang Ren,<sup>1,2</sup> and Qiang Fu<sup>1,2,3,\*</sup>*

<sup>1</sup> Hefei National Research Center for Physical Sciences at the Microscale, University of Science and Technology of China, Hefei 230026, China

<sup>2</sup> Hefei National Laboratory, University of Science and Technology of China, Hefei 230088, China

<sup>3</sup> School of Future Technology, University of Science and Technology of China, Hefei 230026, China

\*Corresponding author: [qfu3@ustc.edu.cn](mailto:qfu3@ustc.edu.cn)

## Energy transfer analysis

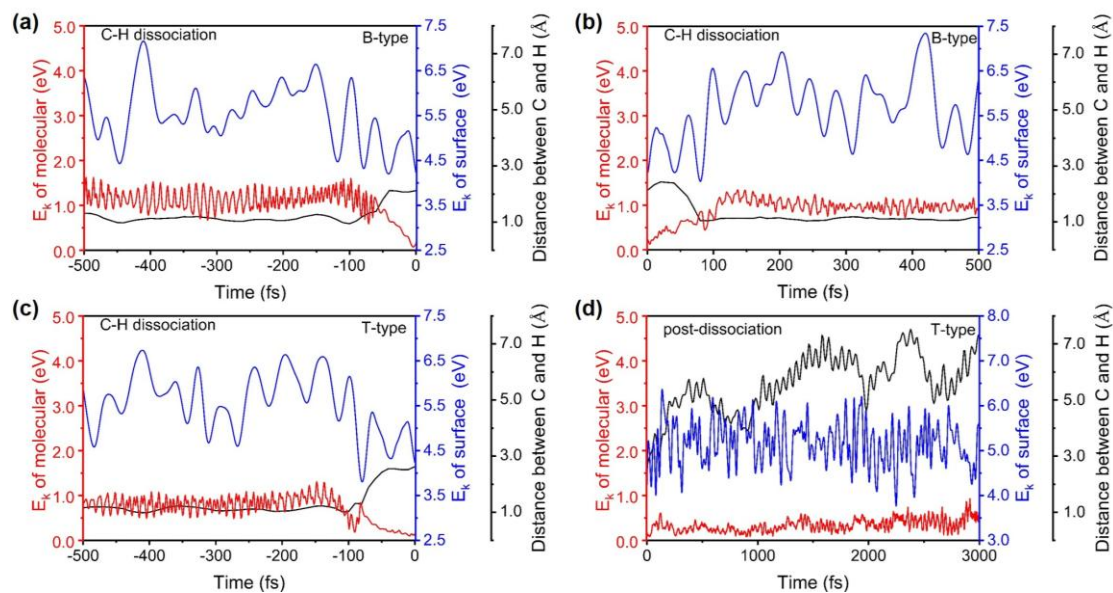

**Figure S1:** Time evolution of the kinetic energy of the  $\text{CH}_3\cdots\text{H}$  species (red lines), kinetic energy of  $\text{La}_2\text{O}_3$  surface atoms (blue lines), and distance between the C and H atoms (corresponding to the dissociating C–H bond, gray lines) for the pre-transition-state (a, c) and post-transition-state (b, d) dissociation processes, respectively. Results for the B-type and T-type pathways are shown in (a, b) and (c, d), respectively.

We have investigated the energy transfer between the  $\text{CH}_4$  reactant and the  $\text{La}_2\text{O}_3(001)$  surface in the entire dissociation process. AIMD simulations are carried out in the micro canonical (NVE) ensemble, and the transition state structures of  $\text{CH}_4$  dissociation (along both the B-type and T-type pathways) are used as the initial configurations (see Supporting Information for more details). We investigate the time evolution of three key quantities: the kinetic energy of the  $\text{CH}_3\cdots\text{H}$  species, the kinetic energy of  $\text{La}_2\text{O}_3$  surface atoms, and the distance between the C and H atoms (corresponding to the dissociating C–H bond) during  $\text{CH}_4$  dissociation. The results are shown in Figure S1. In Figures S1a and S1c, we present  $\text{CH}_4$  dissociation processes toward the transition states for the B-type and T-type pathways, respectively, obtained by time-reversing the backward trajectories (toward the reactant  $\text{CH}_4$ ). It can be seen that both pathways exhibit remarkably similar behavior. As the C–H bond elongates (gray lines), the kinetic energy of the  $\text{CH}_3\cdots\text{H}$  species (red lines) decreases, consistent

with the endothermic nature of this process. More importantly, the kinetic energy of the  $\text{La}_2\text{O}_3(001)$  surface atoms (blue lines) decrease simultaneously, demonstrating that energy transfer occurs from the catalyst surface to the reactant species. However, in the post-transition-state dissociation processes, the B-type and T-type pathways exhibit significant differences, as shown in the comparison between Figures S1b and S1d. For the B-type case, the dissociated  $\text{CH}_3^-$  and  $\text{H}^+$  rapidly recombine (manifested by the decreasing C–H distance), and the kinetic energies of both the  $\text{CH}_3\cdots\text{H}$  species and  $\text{La}_2\text{O}_3$  surface atoms increase simultaneously, demonstrating energy transfer from the recombining  $\text{CH}_4$  species to the  $\text{La}_2\text{O}_3$  surface. For the T-type case, the dissociated  $\text{CH}_3^-$  continues diffusing on the surface, resulting in the effective separation between  $\text{CH}_3^-$  and  $\text{H}^+$ . The overall increasing trend in the kinetic energy of the  $\text{CH}_3^-$  species during the sustained diffusion (Figure S2), particularly after 2 ps, indicates further energy transfer from the  $\text{La}_2\text{O}_3$  surface to  $\text{CH}_3^-$ , likely for supplying energy to maintain its diffusion. Since it has been found that the branching ratio between the B-type and T-type pathways can be modulated by the upward displacement of the surface La cations, the catalyst-reactant energy transfer dynamics can also be adjusted accordingly.

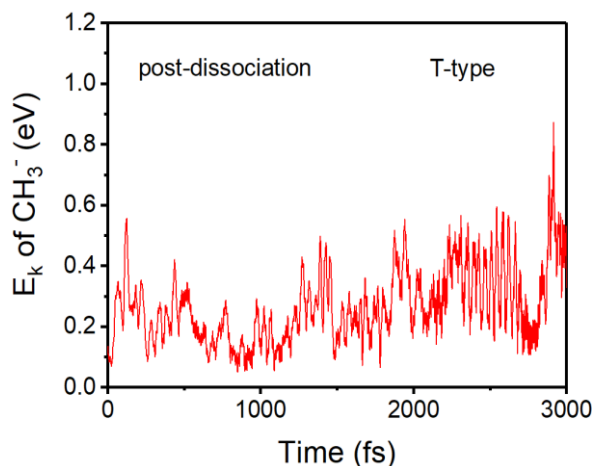

**Figure S2.** Time evolution of the kinetic energy of the  $\text{CH}_3^-$  species along the T-type pathway after the transition state has been overcome.

## Anisotropic $\text{La}^{3+}$ motion on $\text{La}_2\text{O}_3(011)$ surface

We have also examined the  $\text{La}_2\text{O}_3$  (011) surface and found that the upward displacement of  $\text{La}^{3+}$  persists on this facet as well. Our AIMD simulations at 873 K reveal a maximum upward displacement of 0.96 Å, which is notably larger than the movements observed in the downward (0.40 Å), x- (0.58 Å), and y-directions (0.60 Å). The results confirm that the anisotropic upward motion of surface  $\text{La}^{3+}$  is not limited to the (001) surface.

## Other calculation results

**Table S1.** Optimized atomic layer spacing of  $\text{La}_2\text{O}_3$  (001) surface using VASP and CP2K, respectively.

| Atomic layer | CP2K | VASP |
|--------------|------|------|
| 1 and 2      | 0.63 | 0.63 |
| 2 and 3      | 1.55 | 1.55 |
| 3 and 4      | 1.52 | 1.51 |
| 4 and 5      | 0.67 | 0.64 |
| 5 and 6      | 1.80 | 1.79 |

**Table S2.** Calculated energy cost and the force on the  $\text{La}^{3+}$  using VASP and CP2K, respectively, when the  $\text{La}^{3+}$  is lifted by 0.6 Å (since the forces on the lifted  $\text{La}^{3+}$  in the x and y directions are close to zero, only the forces in the z-direction are compared).

|                 | VASP  | CP2K  |
|-----------------|-------|-------|
| Force (eV/Å)    | -1.93 | -1.98 |
| $\Delta E$ (eV) | 0.71  | 0.73  |

**Table S3.** Calculated maxima (MAX) of the amplitudes of  $\text{La}^{3+}$  displacements along different directions on the  $\text{La}_2\text{O}_3(001)$  surface at 873 K using the  $(3 \times 3)$  supercell and the  $(6 \times 6)$  supercell, respectively.

| supercell    | MAX (Å) |        |      |      |
|--------------|---------|--------|------|------|
|              | z-up    | z-down | x    | y    |
| $3 \times 3$ | 0.98    | 0.43   | 0.57 | 0.56 |
| $6 \times 6$ | 1.01    | 0.47   | 0.60 | 0.58 |

**Table S4.** Calculated maxima (MAX) of the amplitudes of the  $\text{La}^{3+}$  displacements along different directions on the  $\text{La}_2\text{O}_3(001)$  surface at 500 K and 1400 K.

| T (K) | MAX (Å) |        |      |      |
|-------|---------|--------|------|------|
|       | z-up    | z-down | x    | y    |
| 500   | 0.59    | 0.25   | 0.31 | 0.27 |
| 1400  | 1.12    | 0.54   | 0.71 | 0.69 |

**Table S5.** Calculated maxima (MAX) of the amplitudes of the  $\text{La}^{3+}$  and  $\text{O}^{2-}$  displacements along different directions on the  $\text{La}_2\text{O}_3(001)$  surface at 873 K.

| ion              | MAX (Å) |        |      |      |
|------------------|---------|--------|------|------|
|                  | z-up    | z-down | x    | y    |
| $\text{La}^{3+}$ | 0.98    | 0.43   | 0.57 | 0.56 |
| $\text{O}^{2-}$  | 0.99    | 1.02   | 0.78 | 0.76 |

**Table S6.** Changes in the calculated Bader charge of  $\text{La}^{3+}$  and  $\text{O}^{2-}$  when the surface  $\text{La}^{3+}$  cation is upward displaced by 0.4 Å.

|                             | $\text{La}^{3+}$ | $\text{O}^{2-}$ |
|-----------------------------|------------------|-----------------|
| $\Delta\text{Charge} ( e )$ | 0.010            | 0.004           |

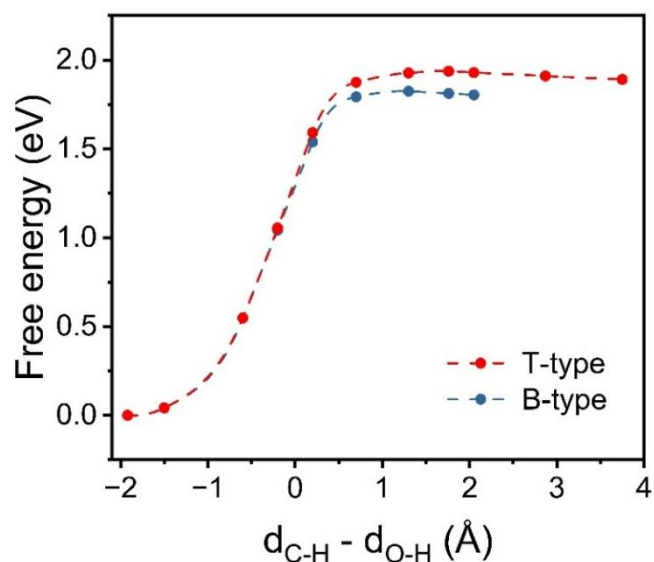

**Figure S3.** Calculated free energy profiles obtained from c-AIMD simulations for the dissociation of  $\text{CH}_4$  at 873 K along the T-type (red line) and B-type (blue line) pathways.

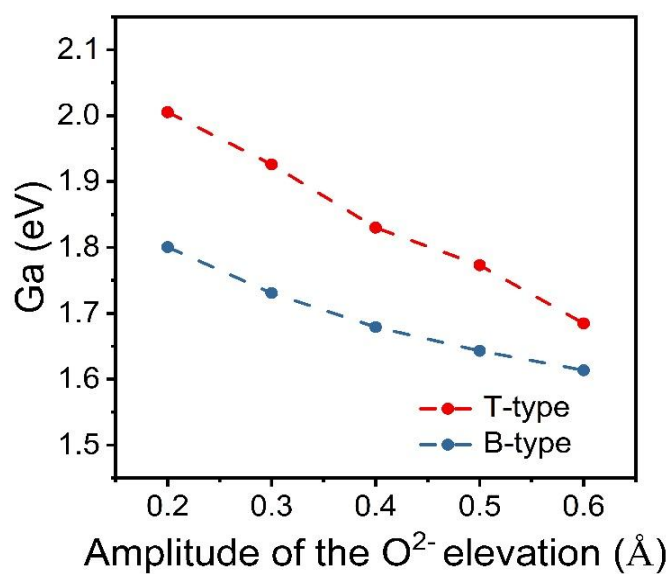

**Figure S4.** Calculated free energy barriers for the C–H bond cleavage of methane along the T-type (red line) and B-type (blue line) pathways at 873 K, respectively, when a surface  $\text{O}^{2-}$  anion is vertically lifted by different amplitudes. The free energy barriers are calculated using CI-NEB combined with *ab initio* thermodynamics analysis.

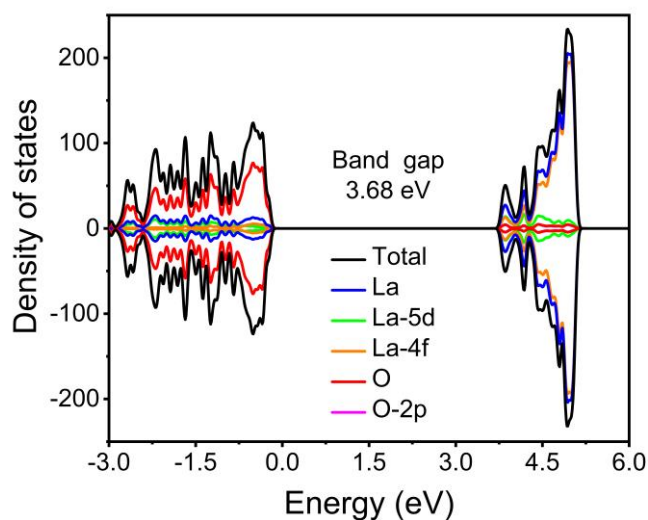

**Figure S5.** Calculated density of states of the  $\text{La}_2\text{O}_3$  (001) surface.

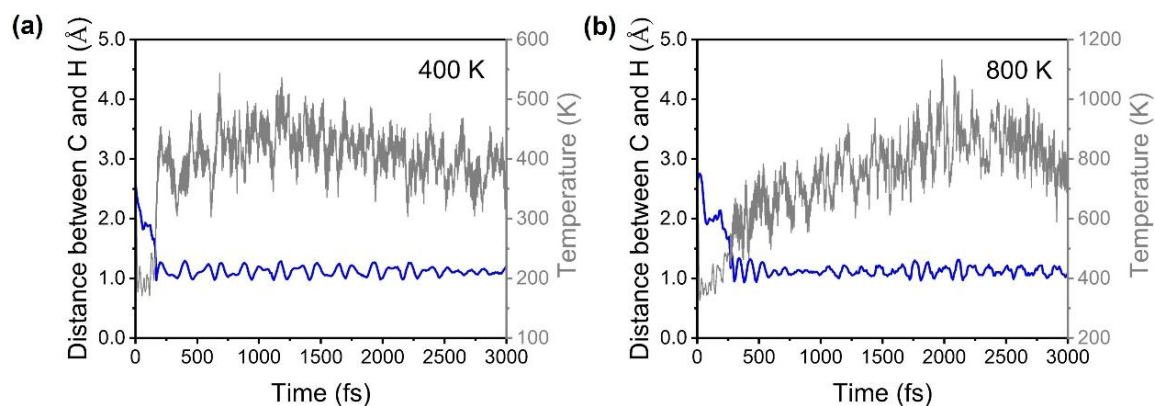

**Figure S6.** Changes in the distance (blue lines) between the C and H atoms of a dissociated C-H bond for the dissociation product of the B-type pathway from the AIMD trajectories obtained at 400 K (a) and 800 K (b). The changes in the temperature are shown by gray lines.

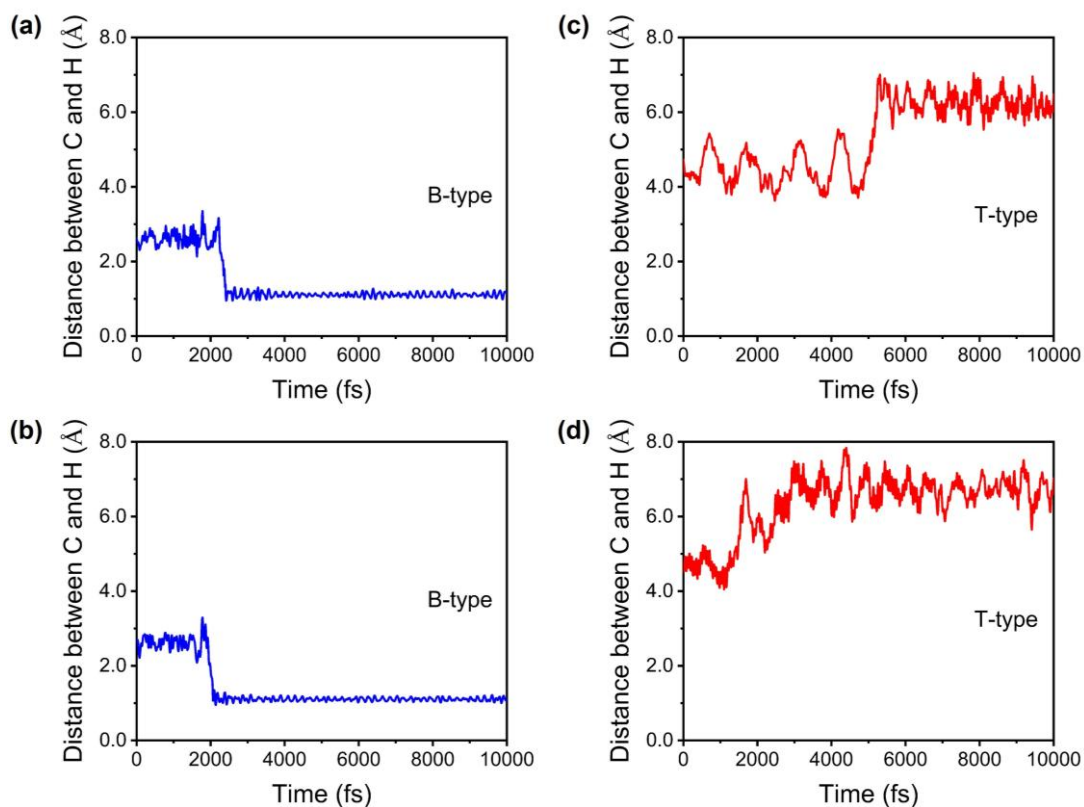

**Figure S7.** Changes in the distance between the C and H atoms of a dissociated C-H bond for the dissociation products of the B-type (a, b) and T-type (c, d) pathways from two AIMD simulations using different initial velocities. The temperature of the AIMD simulations is set to 250 K.

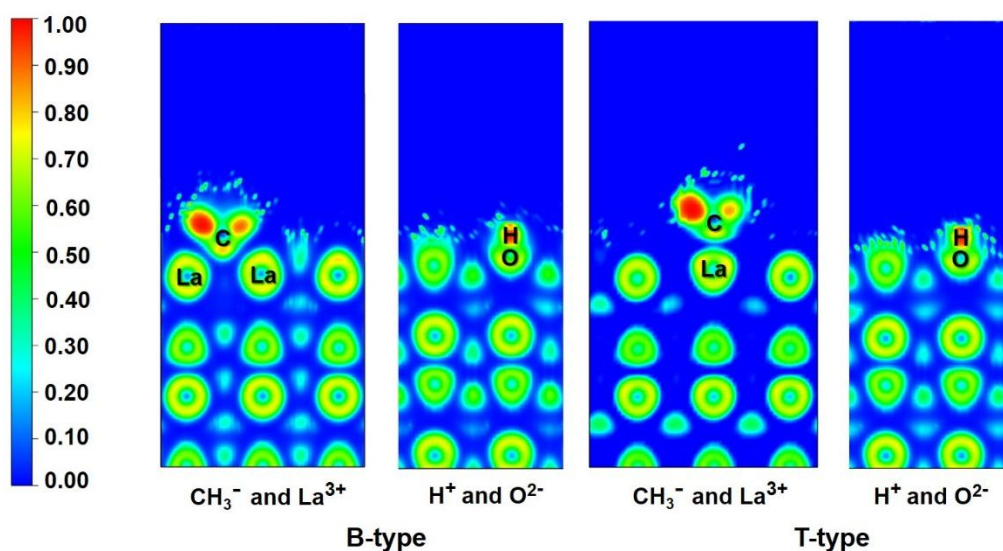

**Figure S8.** Calculated electron localization function (ELF) of the adsorption configurations of  $\text{CH}_3^-$  and  $\text{H}^+$  adsorbed on  $\text{La}^{3+}$  and  $\text{O}^{2-}$ , respectively, formed by  $\text{CH}_4$  dissociation via the B-type and T-type pathways.



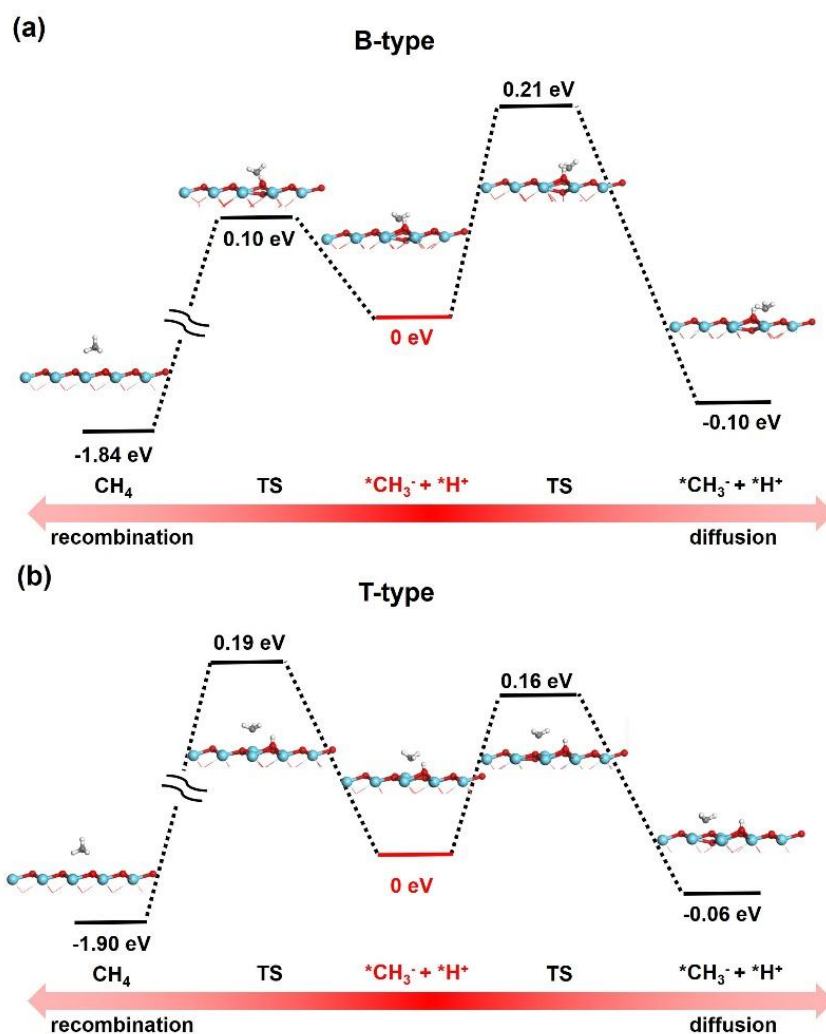

**Figure S9.** Calculated free energy profiles of both the recombination of  $\text{CH}_3^-$  and  $\text{H}^+$  and the diffusion of  $\text{CH}_3^-$  for the dissociated products via the B-type (a) and T-type (b) pathways on the  $\text{La}_2\text{O}_3(001)$  surface at 873 K. The side views of all configurations are shown here.
